# Supplementary material
Source: ML conference proceedings conference paper supplement (https://openreview.net/forum?id=0Q9zTGHOda)
Supplement: supplementary_material [file attachment]

# Supplementary Materials: Instance-Level Panoramic Audio-Visual Saliency Detection and Ranking

Anonymous Authors

## 1 CUBEMAP-PROJECTION SAMPLING

Given the input image feature map  $\mathbf{f}^V$ , let  $p_i$  be a pixel in the feature map, namely central point, and  $p_{ij}$  refers to its neighbor point. We sample a small set of neighbor points around each central point by leveraging cubemap projection. It contains the following steps:

i) **quirectangular-to-cube transformation**. Let the side length of a cube map be  $w$ . As the field-of-view (FoV) of each face is  $90^\circ$ , each face can be treated as a perspective camera with a focal length of  $\frac{w}{2}$ , and they all share the same center point in the world coordinate system. Due to the fixed viewing direction in cubemap projection, a rotation matrix  $R_h$  can represent the extrinsic matrix of each camera. For a pixel  $p_i$  on equirectangular map, we can transform it into the coordinate on the certain cube face  $h$ . This process is detailed in Equation (1) and Algorithm 2.

$$q_i^x = \sin(\theta) \cdot \cos(\phi); q_i^y = \sin(\phi); q_i^z = \cos(\theta) \cdot \cos(\phi)$$

$$K = \begin{bmatrix} w/2 & 0 & w/2 \\ 0 & w/2 & w/2 \\ 0 & 0 & 1 \end{bmatrix}; \hat{p}_i = K \cdot R_h^T \cdot q_i \quad (1)$$

where  $\theta$  and  $\phi$  represent the longitude and latitude of point  $p_i$  on the sphere. The range of  $\theta$  spans from  $-\pi$  to  $+\pi$ , while the range of  $\phi$  spans from  $-0.5\pi$  to  $+0.5\pi$ . The  $x$ ,  $y$ , and  $z$  components of vector  $q_i$  are represented as  $q_i^x$ ,  $q_i^y$ , and  $q_i^z$ .

ii) **uniform sampling on the cube map**. Similar to equirectangular sampling, we select the eight nearest neighbor pixels of each pixel on the equirectangular projection as neighbor points. The process is given in Equation (2):

$$p_{ij} = p_i(x \pm a, y \pm b), \{a, b = 0, 1; a, b = 0, 2\} \quad (2)$$

iii) **cube-to-equirectangular transformation**. All these neighbors are projected back to the equirectangular domain. Given a neighboring point  $p_{ij}$  on a specific face  $h$ , we can perform a coordinate transformation to map it onto the ER projection, as illustrated in Equation (3) and Algorithm 1.

$$q_{ij} = R_i \cdot K^{-1} \cdot \hat{p}_{ij}$$

$$\theta = \arctan(q_{ij}^x / q_{ij}^z) \quad (3)$$

$$\phi = \arcsin(q_{ij}^y / |q_{ij}|)$$

---

### Algorithm 1: Cube-to-Equirectangular

---

**Input:**  $x\_c$  and  $y\_c$ :  $x$  and  $y$  coordinates of the input cube map;  $side$ : the face of the input cube map;  $w\_c$ : width of the input cube map.

**Output:**  $x\_e$  and  $y\_e$ :  $x$  and  $y$  coordinates of the output equirectangular map

// 1. define the transformation function from 3D Cartesian coordinate into spherical coordinates;

**Function** GetThetaPhi( $x, y, z$ ):

```

     $dv \leftarrow \sqrt{x \cdot x + y \cdot y + z \cdot z};$ 
     $x' \leftarrow x/dv;$ 
     $y' \leftarrow y/dv;$ 
     $z' \leftarrow z/dv;$ 
     $\theta \leftarrow \arctan 2(y', x');$ 
     $\phi \leftarrow \arcsin(z');$ 
    return  $\theta, \phi;$ 

```

// 2. compute the spherical coordinates  $\theta$  and  $\phi$  of the output equirectangular map;

**if**  $side == \text{"front"}$  **then**

```

    |  $\theta, \phi \leftarrow \text{GetThetaPhi}(1, x, y);$ 

```

**end**

**else if**  $side == \text{"right"}$  **then**

```

    |  $\theta, \phi \leftarrow \text{GetThetaPhi}(-x, 1, y);$ 

```

**end**

**else if**  $side == \text{"left"}$  **then**

```

    |  $\theta, \phi \leftarrow \text{GetThetaPhi}(x, -1, y);$ 

```

**end**

**else if**  $side == \text{"back"}$  **then**

```

    |  $\theta, \phi \leftarrow \text{GetThetaPhi}(-1, -x, y);$ 

```

**end**

**else if**  $side == \text{"bottom"}$  **then**

```

    |  $\theta, \phi \leftarrow \text{GetThetaPhi}(-y, x, 1);$ 

```

**end**

**else if**  $side == \text{"top"}$  **then**

```

    |  $\theta, \phi \leftarrow \text{GetThetaPhi}(y, x, -1);$ 

```

**end**

// 3. map spherical coordinates to 2D coordinates;

```

 $x\_e \leftarrow 0.5 + 0.5 \cdot (\theta/\pi);$ 

```

```

 $y\_e \leftarrow 0.5 + \phi/\pi;$ 

```

---

**Algorithm 2:** Equirectangular-to-Cube

**Input** :  $x_e$  and  $y_e$ : x and y coordinates of the input equirectangular map;  $h_e$  and  $w_e$ : height and width of the input equirectangular map;  $w_c$ : width of the output cube map.

**Output**:  $x_c$  and  $y_c$ : x and y coordinates of the output cube map; *side*: the face of the output cube map.

// 1. compute spherical coordinates  $\theta$  and  $\phi$ ;

$\theta \leftarrow (x_e/w_e - 0.5) \cdot 2 \cdot \pi$ ;

$\phi \leftarrow (y_e/h_e - 0.5) \cdot \pi$ ;

// 2. compute 3D Cartesian coordinates  $x$ ,  $y$ , and  $z$ ;

$x \leftarrow \cos(\phi) \cdot \sin(\theta)$ ;

$y \leftarrow \sin(\phi)$ ;

$z \leftarrow \cos(\phi) \cdot \cos(\theta)$ ;

// 3. compute the absolute value of  $x$ ,  $y$ , and  $z$ ;

$x_{abs} \leftarrow |x|$ ;

$y_{abs} \leftarrow |y|$ ;

$z_{abs} \leftarrow |z|$ ;

// 4. compute 3D cube coordinates of the six faces;

if  $x_{abs} \geq y_{abs}$  and  $x_{abs} \geq z_{abs}$  then

    if  $x > 0$  then

$x_c, y_c, side \leftarrow -z, y, \text{"right"}$ ;

    end

    else

$x_c, y_c, side \leftarrow z, y, \text{"left"}$ ;

    end

$max\_axis \leftarrow x_{abs}$ ;

end

else if  $y_{abs} \geq x_{abs}$  and  $y_{abs} \geq z_{abs}$  then

    if  $y > 0$  then

$x_c, y_c, side \leftarrow x, -z, \text{"bottom"}$ ;

    end

    else

$x_c, y_c, side \leftarrow x, z, \text{"top"}$ ;

    end

$max\_axis \leftarrow y_{abs}$ ;

end

else

    if  $z > 0$  then

$x_c, y_c, side \leftarrow x, y, \text{"front"}$ ;

    end

    else

$x_c, y_c, side \leftarrow -x, y, \text{"back"}$ ;

    end

$max\_axis \leftarrow z_{abs}$ ;

end

// 5. map 3D coordinates to 2D coordinates;

$x_c \leftarrow x_c / max\_axis$ ;

$y_c \leftarrow y_c / max\_axis$ ;

$x_c \leftarrow (x_c + 1) / 2 \cdot cw$ ;

$y_c \leftarrow (y_c + 1) / 2 \cdot cw$ ;
